# Supplementary material for: The IS6 family, a clinically important group of insertion sequences including IS26
Source: PubMed Central journal article supplement (PMC7986276; doi:10.1186/s13100-021-00239-x), 2021-03-23

Fig. S1 a

bIRL

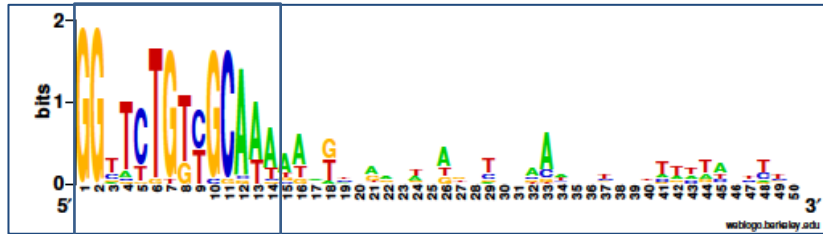

cIRL

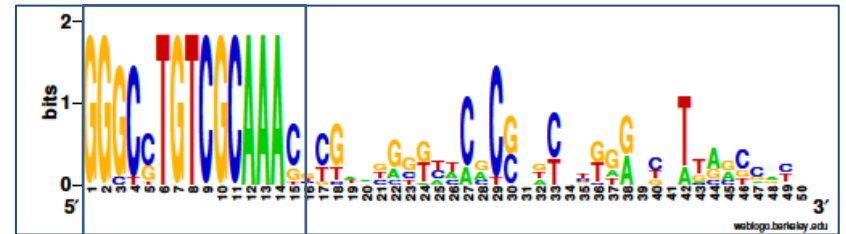

bIRR

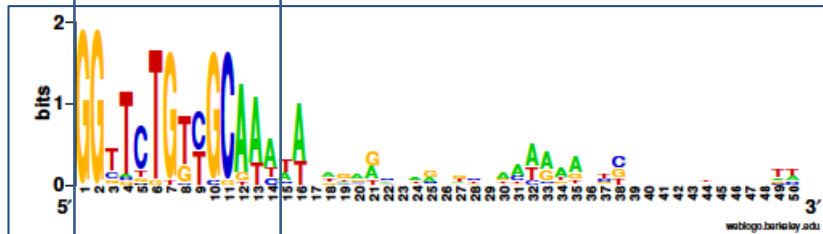

cIRR

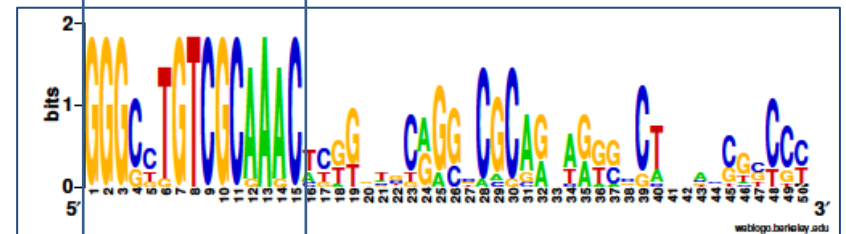

bBoth

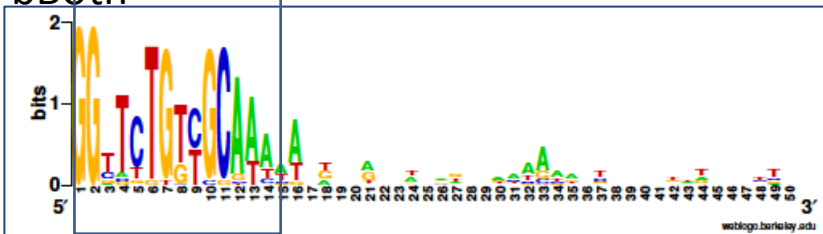

cBoth

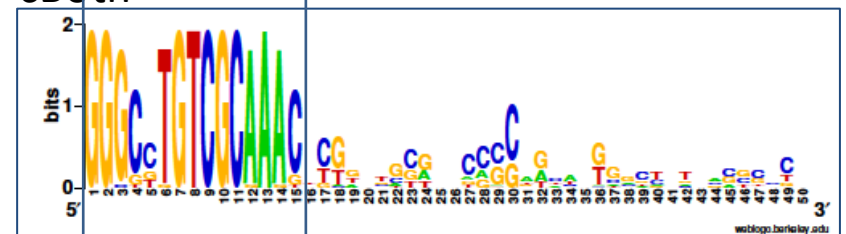







Fig. S1 e

jIRL

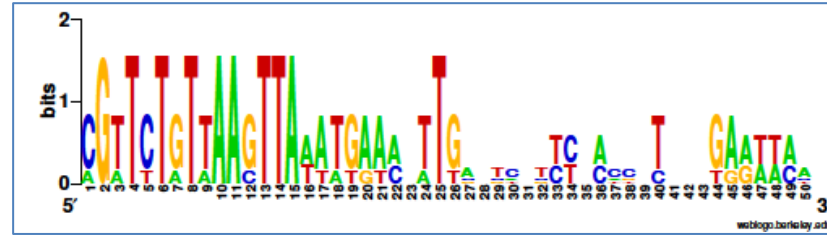

jIRR

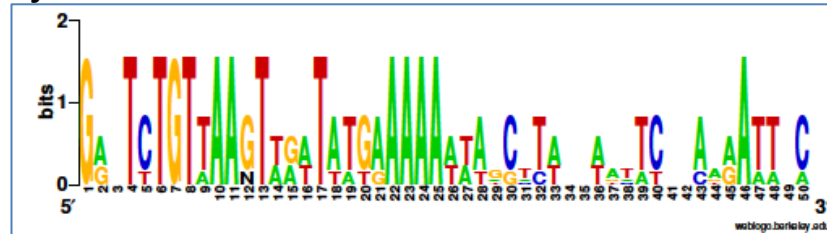

jBoth

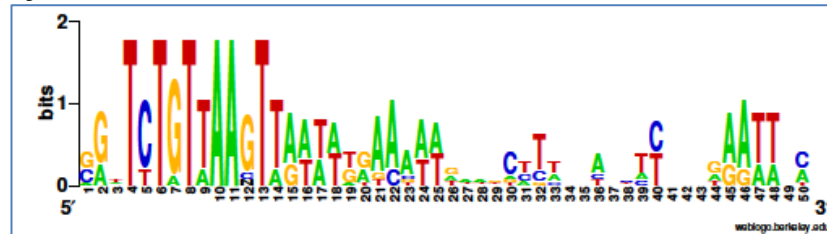

Fig. S1 f

### AiRL

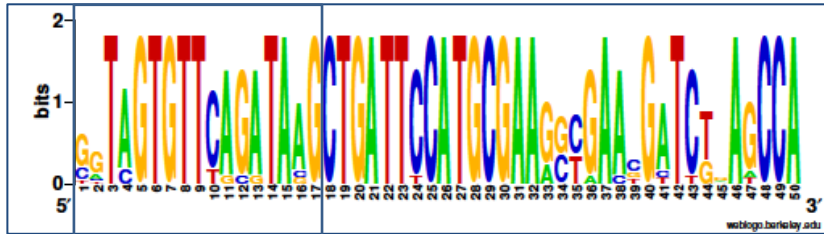

### AiIRR

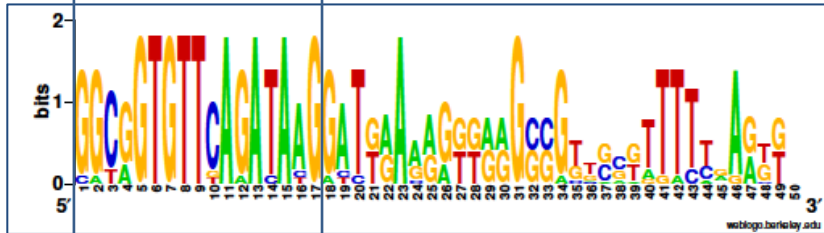

### AiBoth

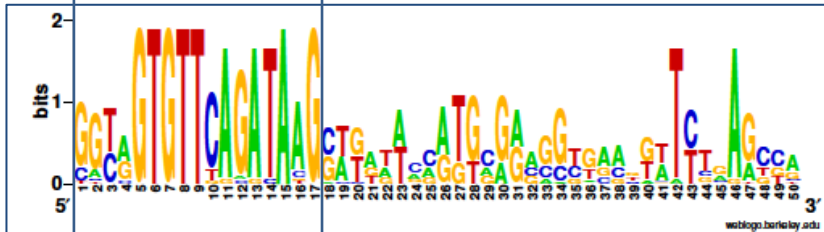

### AiiRL

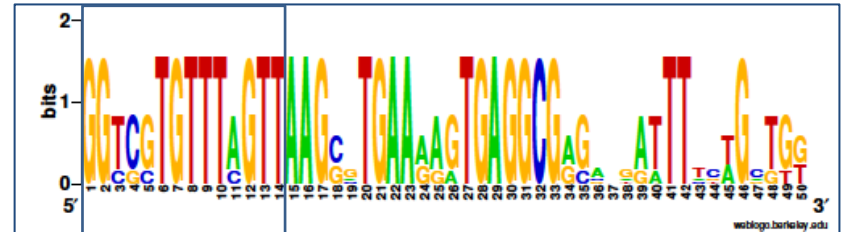

### AiiIRR

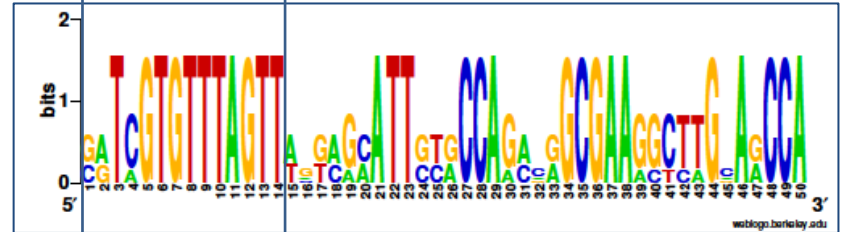

### AiiBoth

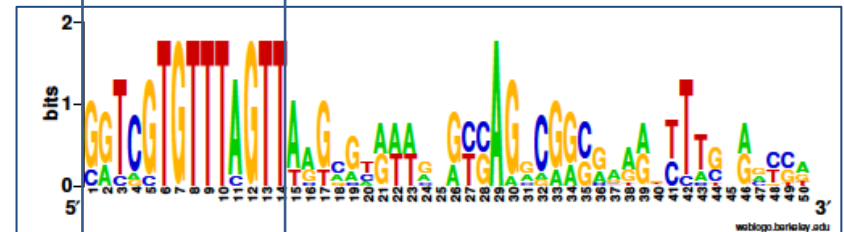

Fig. S1 g

AiiiIRL

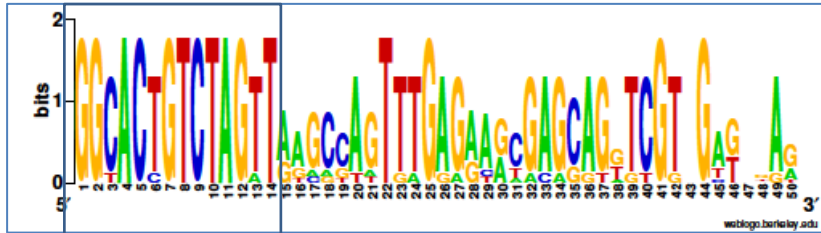

AiiiIRR

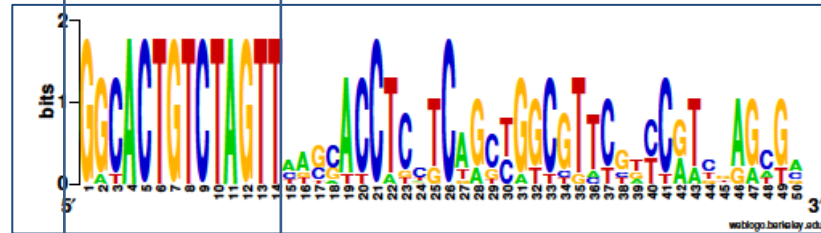

AiiiBoth

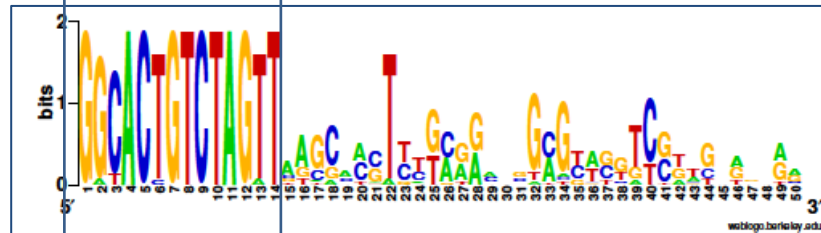

AivIRL

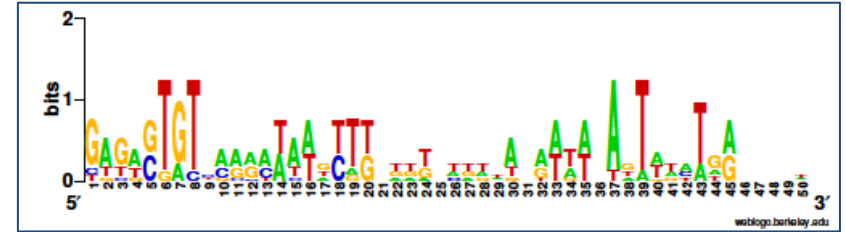

AivIRR

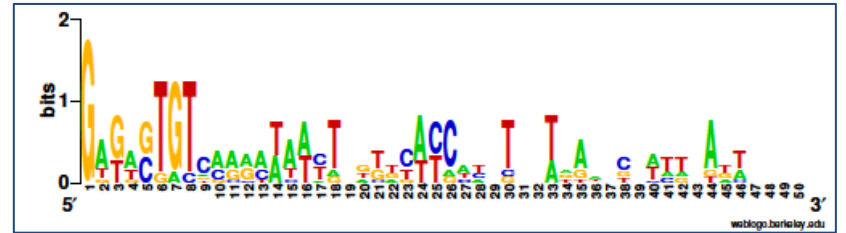

AivBoth

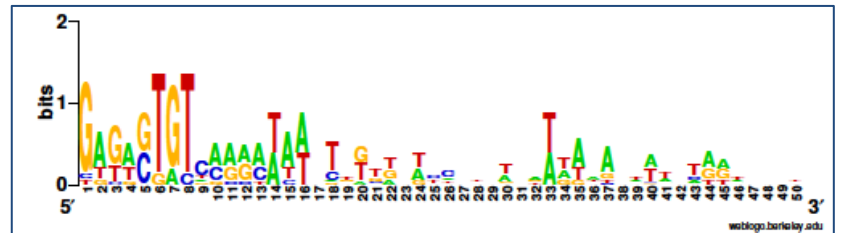

Fig. S1 h

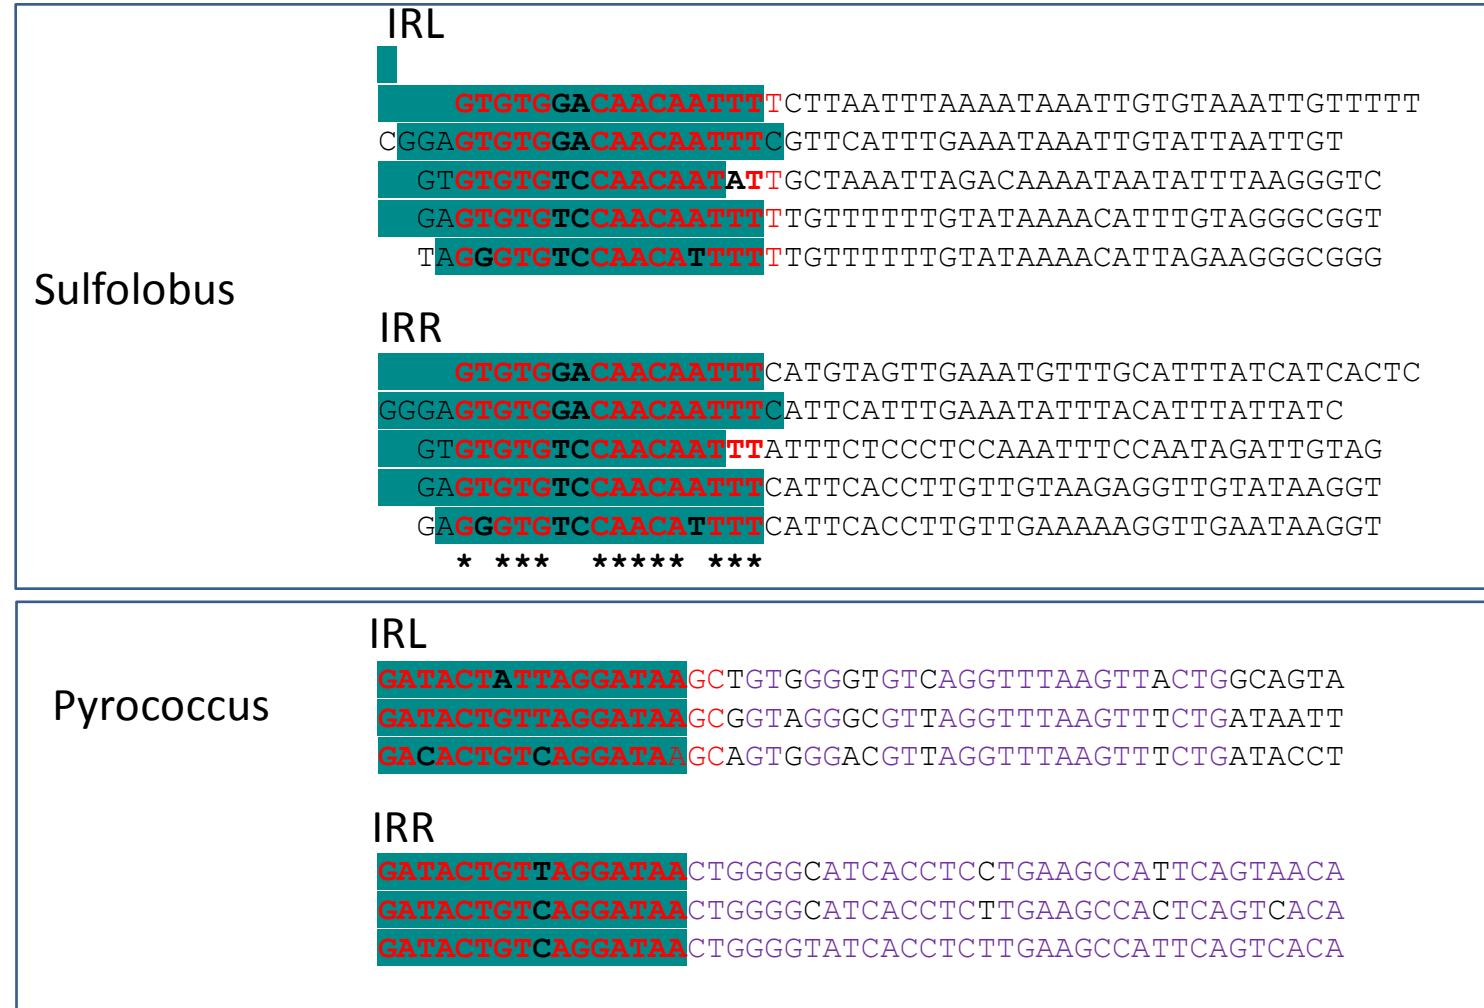

Supplement: 13100_2021_239_MOESM1_ESM.pdf [file 13100_2021_239_MOESM1_ESM.pdf]
