# Supplementary material for: The IS6 family, a clinically important group of insertion sequences including IS26
Source: PubMed Central journal article supplement (PMC7986276; doi:10.1186/s13100-021-00239-x), 2021-03-23

Fig. S2

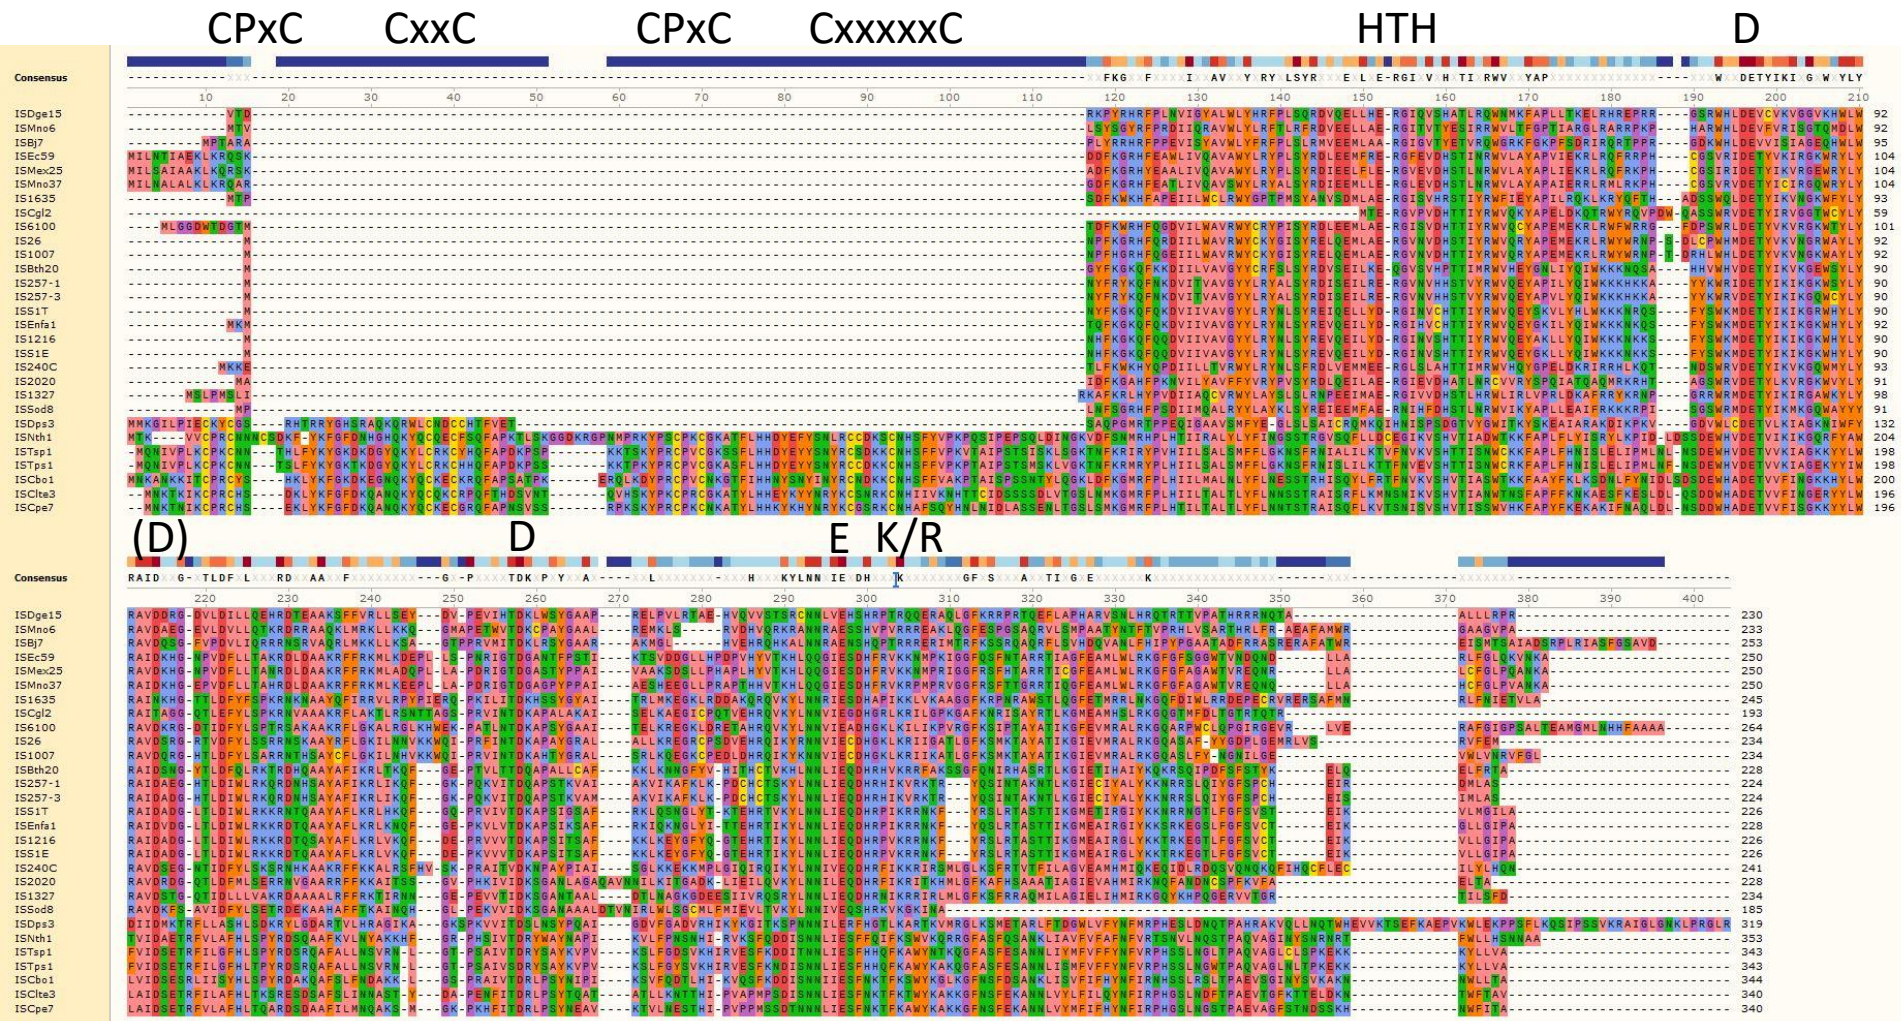

Supplement: 13100_2021_239_MOESM2_ESM.pdf [file 13100_2021_239_MOESM2_ESM.pdf]
